# Supplementary material for: Resolving the π-assisted U–N σf-bond formation using quantum information theory
Source: Royal Society of Chemistry journal article supplement (doi:10.1039/d2cp03377a), 2022-01-01
Supplement: d2cp03377a1.pdf [file d2cp03377a1.pdf]

# Resolving the $\pi$ -assisted U–N $\sigma_f$ -bond formation using quantum information theory

Aleksandra Leszczyk,<sup>a</sup> Tibor Dome,<sup>b,c</sup> Paweł Tecmer,<sup>a</sup> Dariusz Kędziera,<sup>d</sup> and  
Katharina Boguslawski<sup>a</sup>

<sup>a</sup> *Institute of Physics, Faculty of Physics, Astronomy and Informatics, Nicolaus Copernicus  
University in Toruń, Grudziądzka 5, 87-100 Toruń, Poland; E-mail: ptecmer@fizyka.umk.pl;  
k.boguslawski@fizyka.umk.pl*

<sup>b</sup> *Institute for Theoretical Physics, ETH Zürich, 8093 Zürich, Switzerland*

<sup>c</sup> *Institute of Astronomy, University of Cambridge, Madingley Road Cambridge, CB3 0HA, United  
Kingdom*

<sup>d</sup> *Faculty of Chemistry, Nicolaus Copernicus University in Toruń, Gagarina 7, 87-100 Toruń*

## Supplementary Information

## S1 Orbital-pair correlation diagrams

### S1.1 $\text{UO}_2^{2+}$

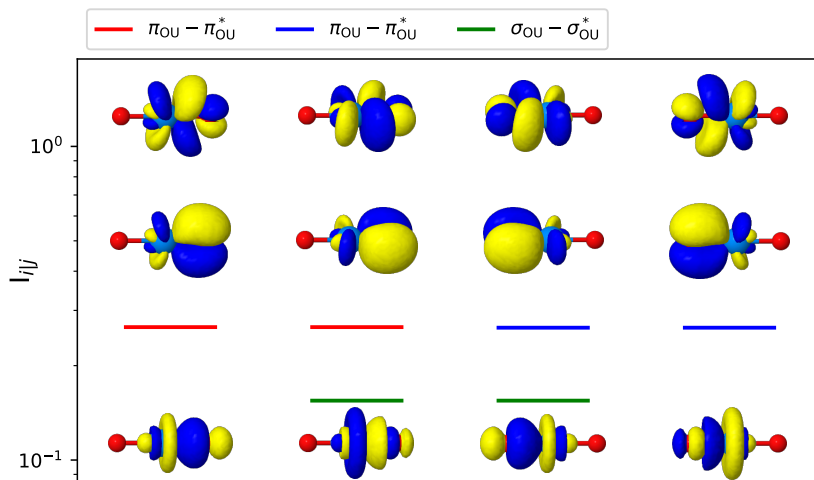

Figure S1: Selected orbital-pair correlation measures for the linear  $\text{UO}_2^{2+}$  molecule obtained from a fpLCCD wave function.

### S1.2 $\text{NUO}^+$

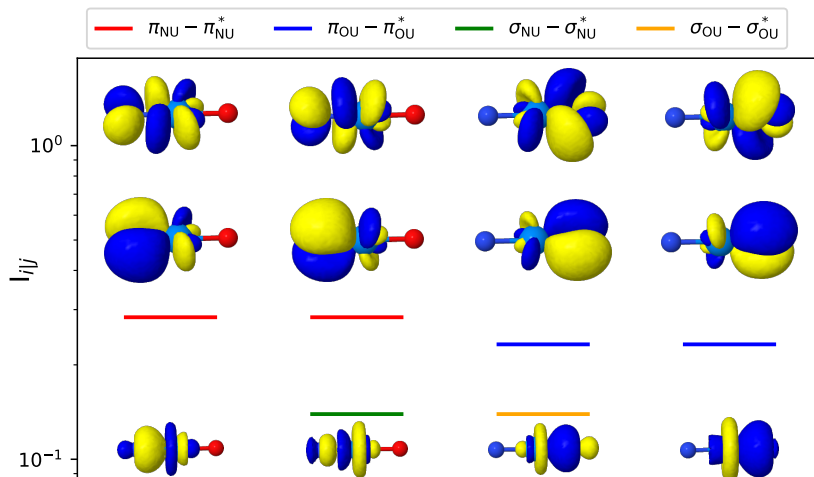

Figure S2: Selected orbital-pair correlation measures for the linear  $\text{NUO}^+$  molecule obtained from a fpLCCD wave function.

### S1.3 Reaction pathway

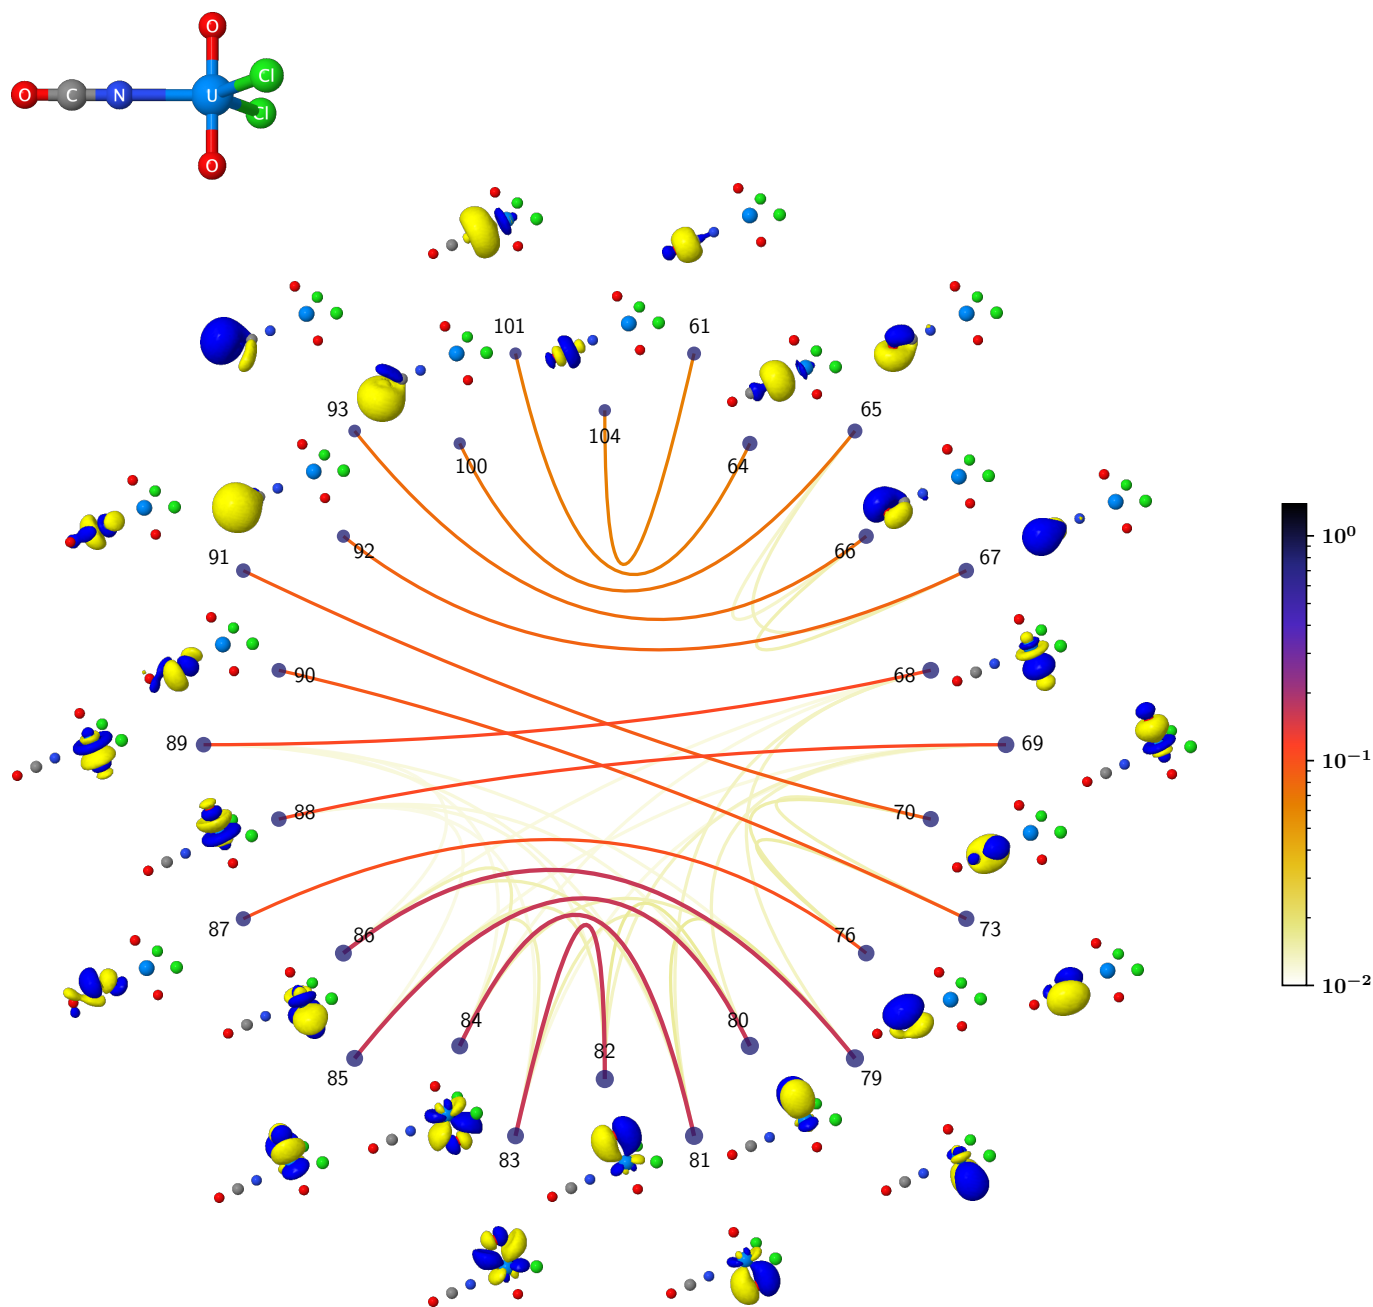

Figure S3: Orbital-pair correlation measures for the ground state of the reaction coordinate obtained from a fpLCCD wave function. The values of the single-orbital entropies are coded by the size of the dots corresponding to each orbital. The mutual information values correspond to color and width of lines connecting orbitals.

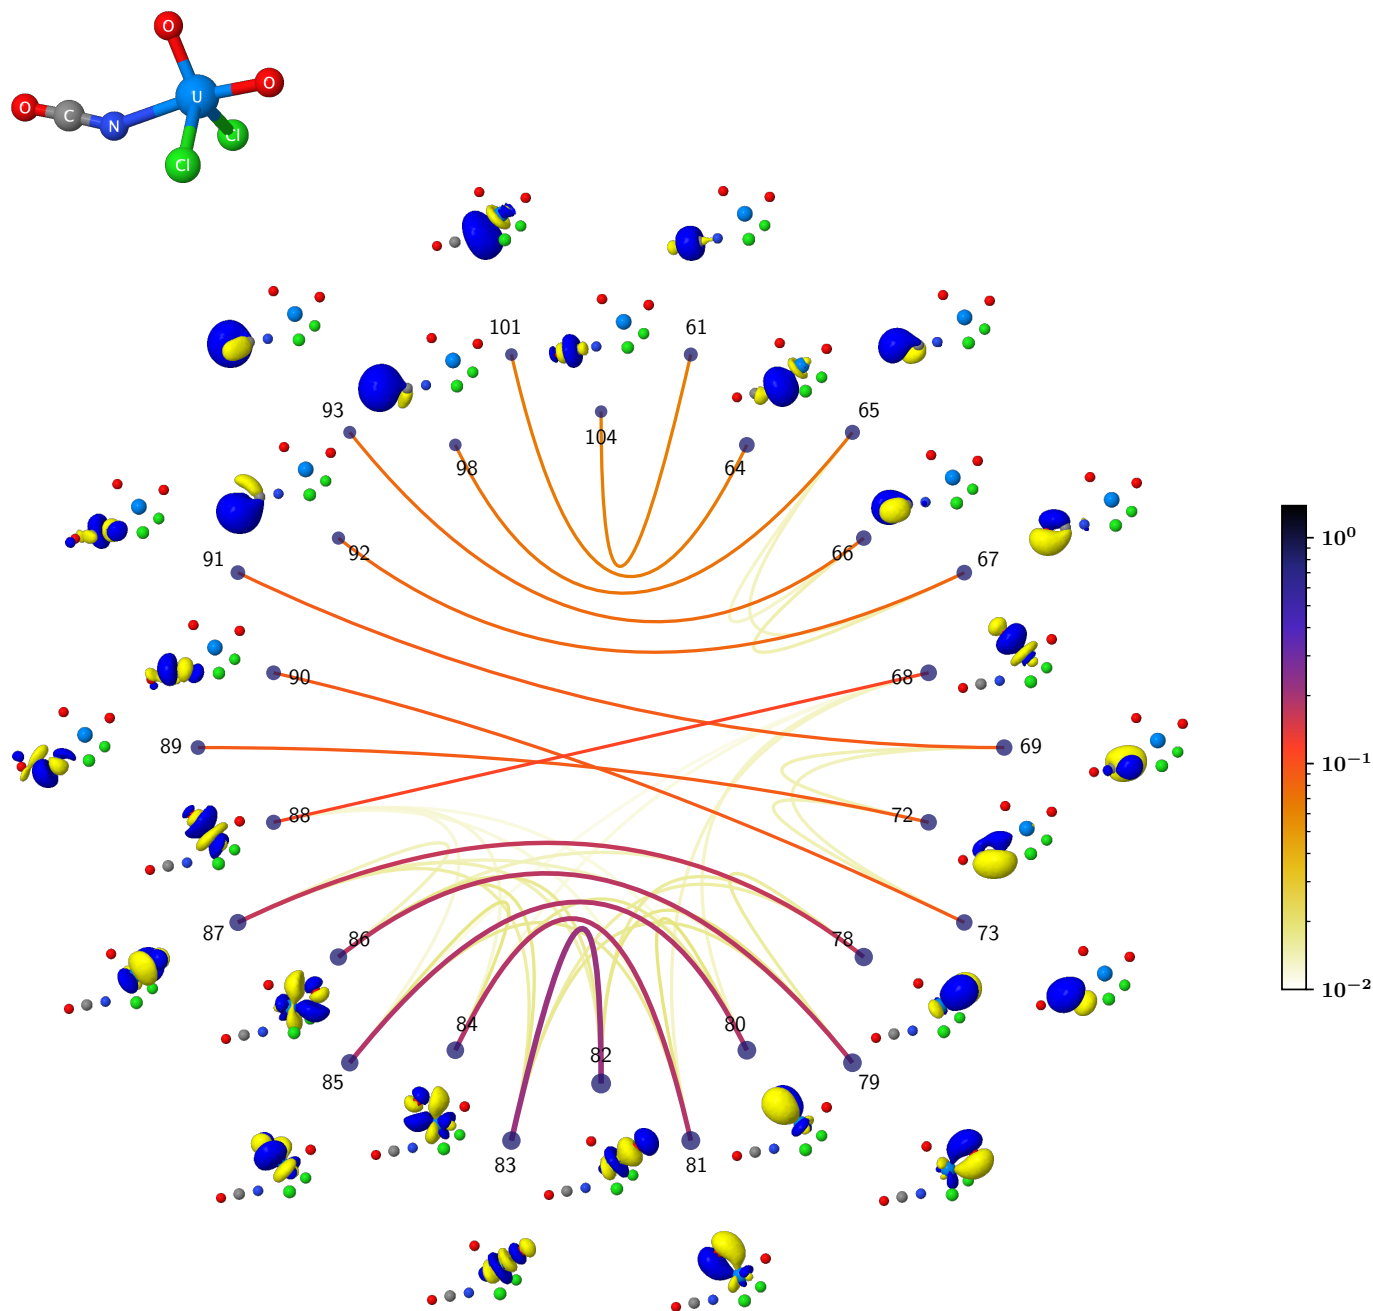

Figure S4: Orbital-pair correlation measures for the isomer of the reaction coordinate obtained from a fpLCCD wave function. The values of the single-orbital entropies are coded by the size of the dots corresponding to each orbital. The mutual information values correspond to color and width of lines connecting orbitals. All orbital-pair correlations larger than 0.09 have been plotted.

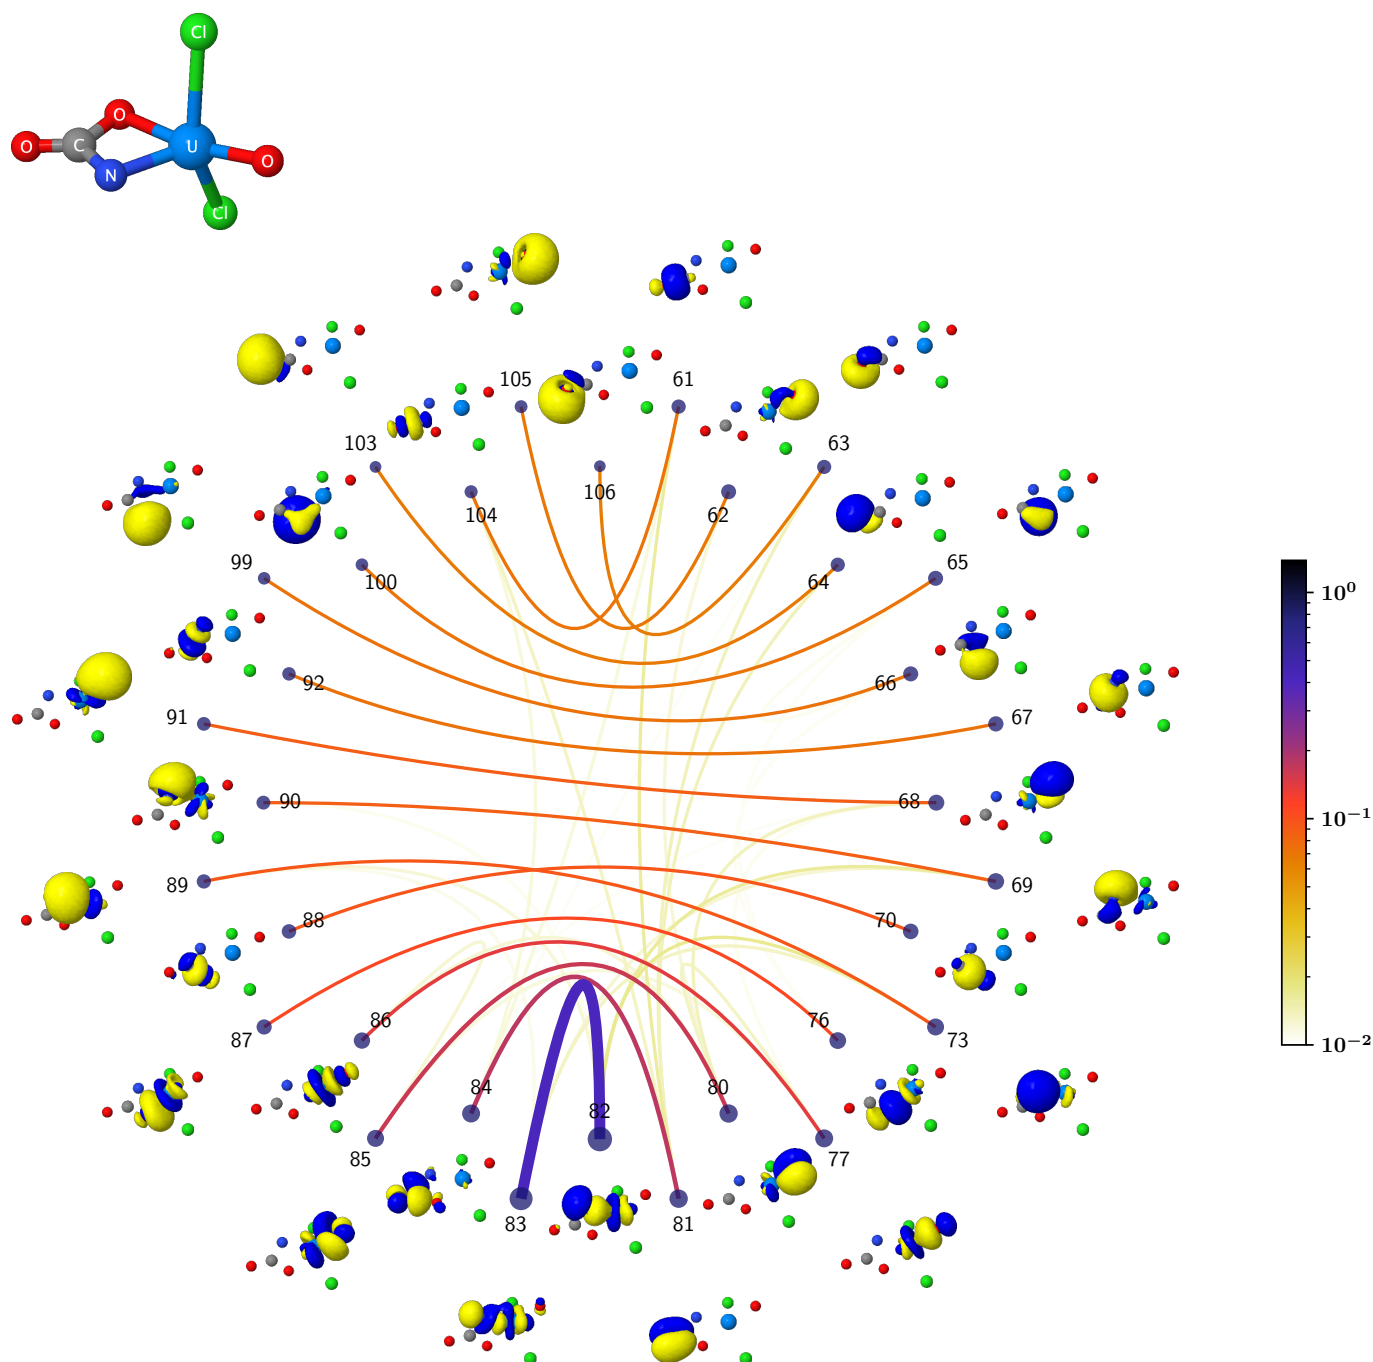

Figure S5: Orbital-pair correlation measures for the first transition state of the reaction coordinate obtained from a fpLCCD wave function. The values of the single-orbital entropies are coded by the size of the dots corresponding to each orbital. The mutual information values correspond to color and width of lines connecting orbitals. All orbital-pair correlations larger than 0.09 have been plotted.

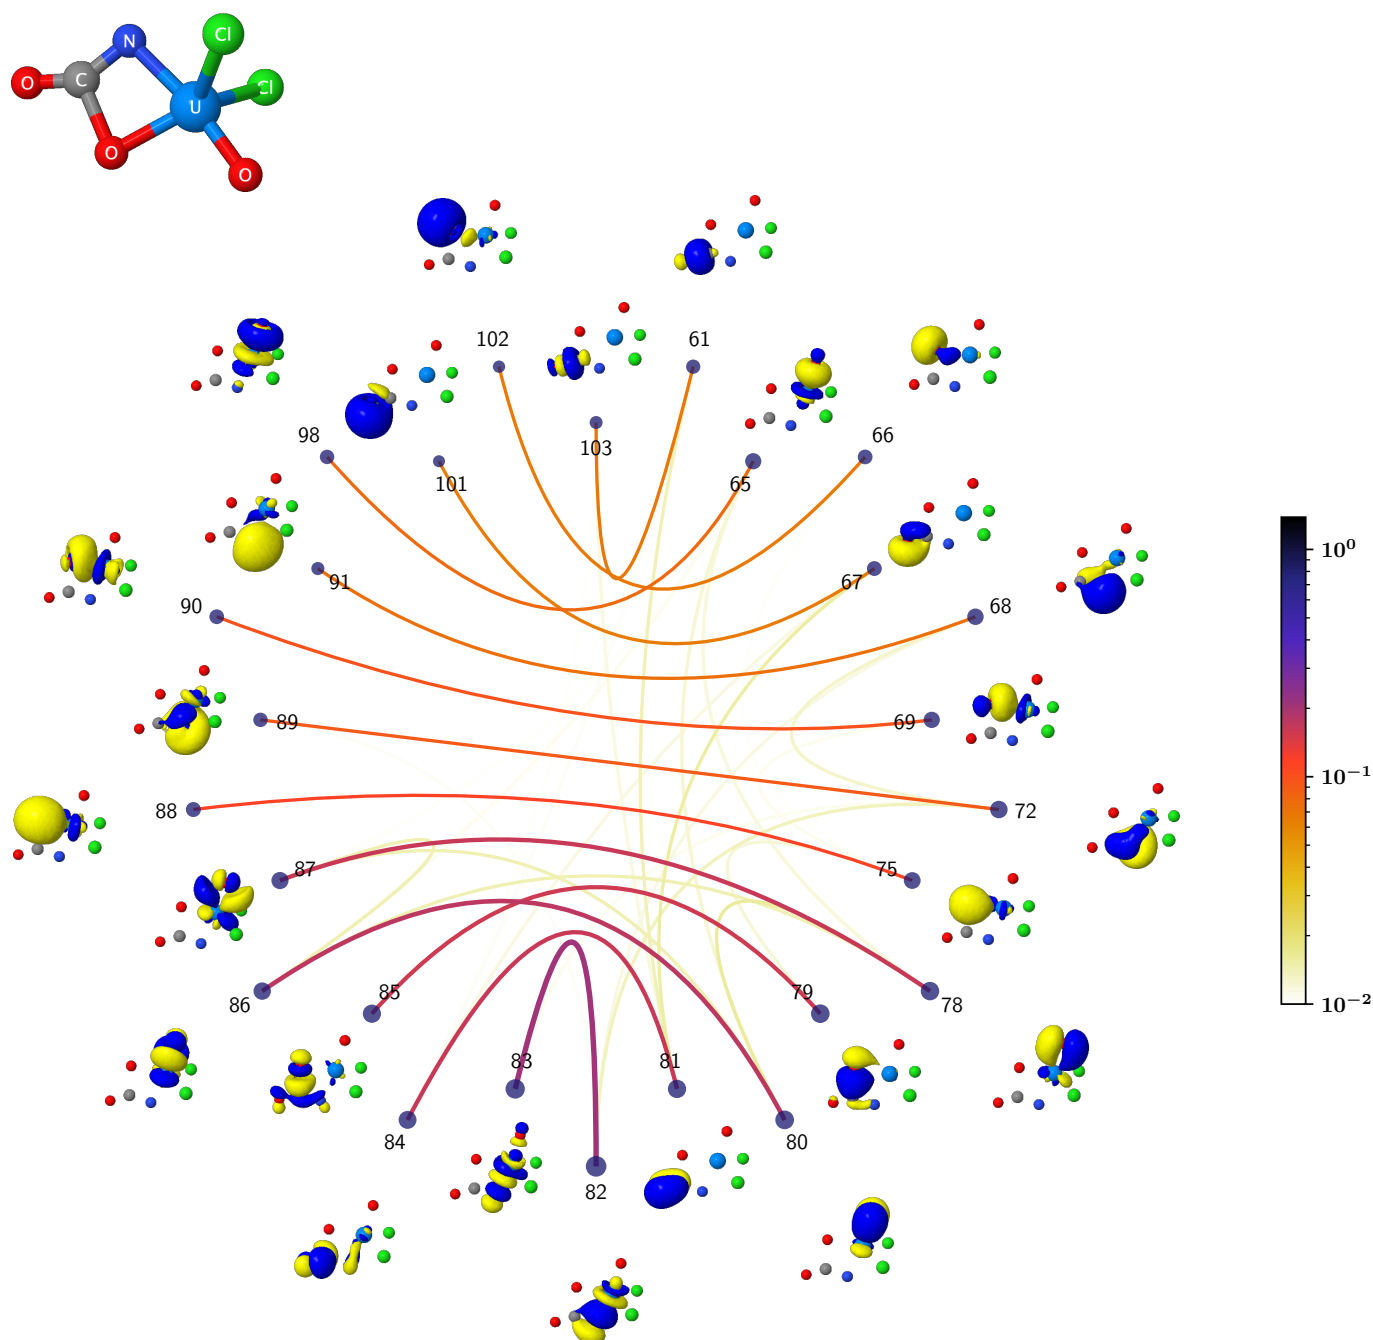

Figure S6: Orbital-pair correlation measures for the second transition state of the reaction coordinate obtained from a fpLCCD wave function. The values of the single-orbital entropies are coded by the size of the dots corresponding to each orbital. The mutual information values correspond to color and width of lines connecting orbitals. All orbital-pair correlations larger than 0.09 have been plotted.

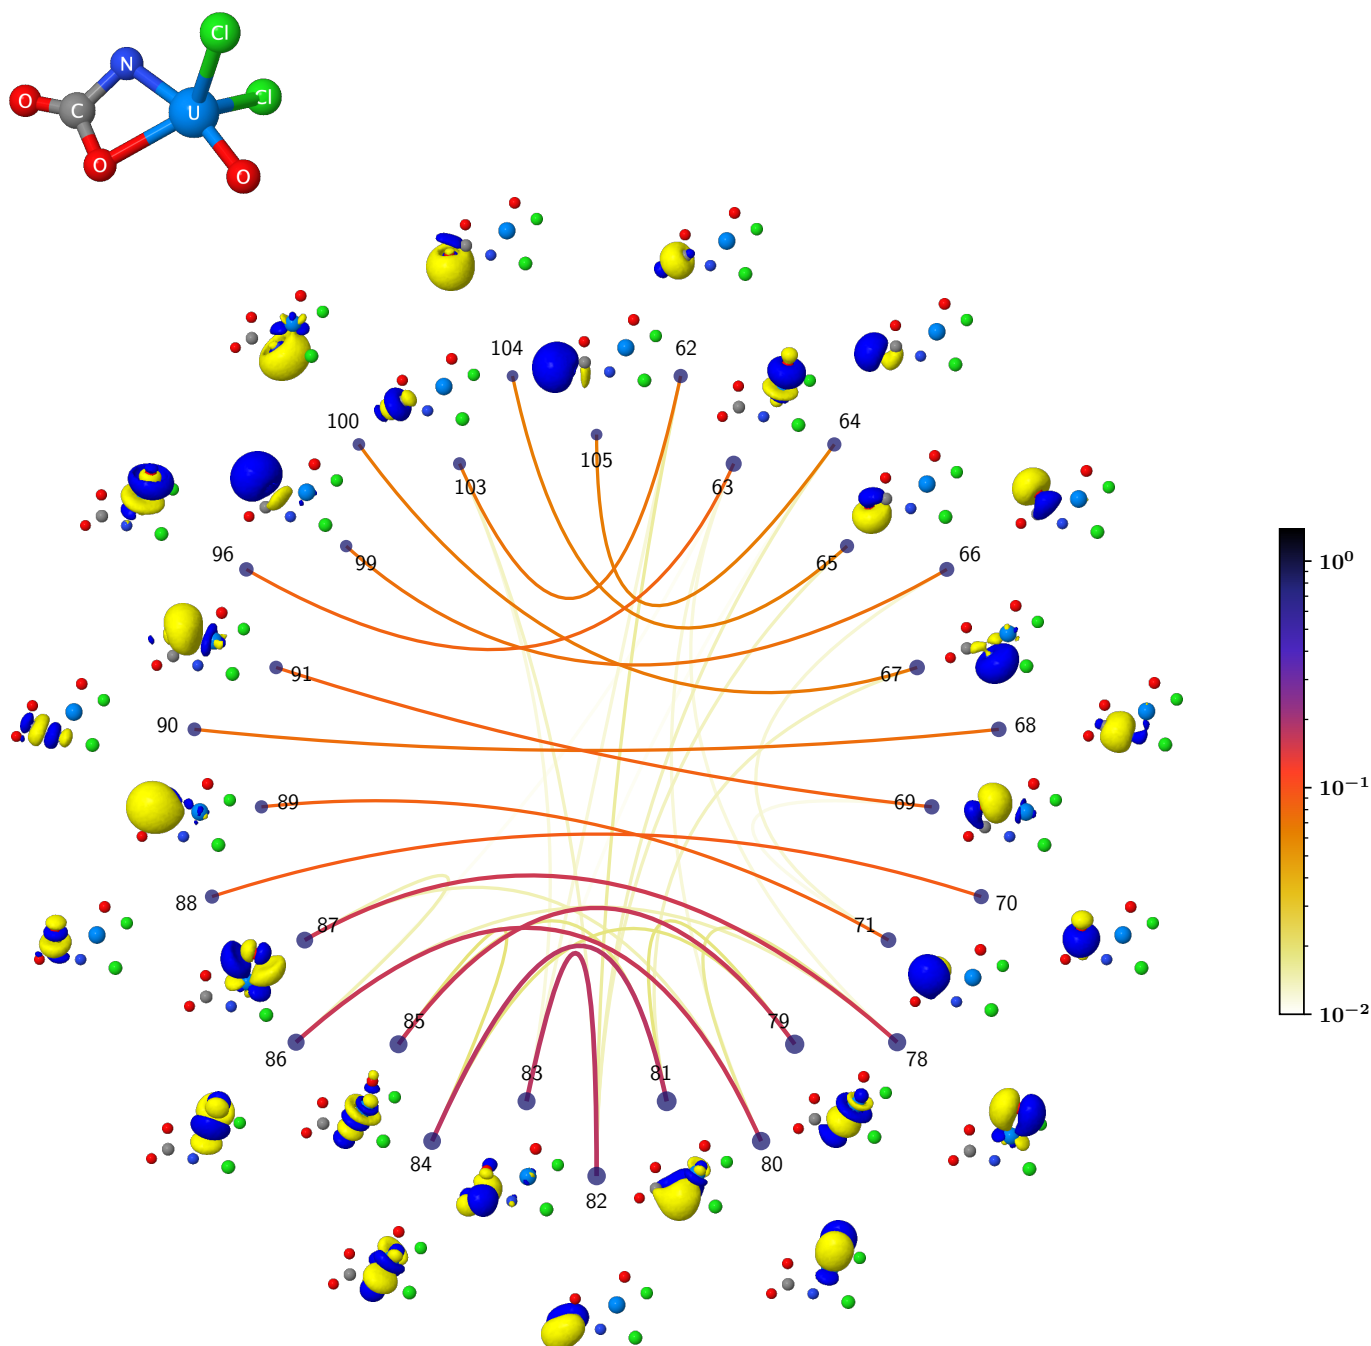

Figure S7: Orbital-pair correlation measures for the first intermediate state of the reaction coordinate obtained from a fpLCCD wave function. The values of the single-orbital entropies are coded by the size of the dots corresponding to each orbital. The mutual information values correspond to color and width of lines connecting orbitals. All orbital-pair correlations larger than 0.09 have been plotted.

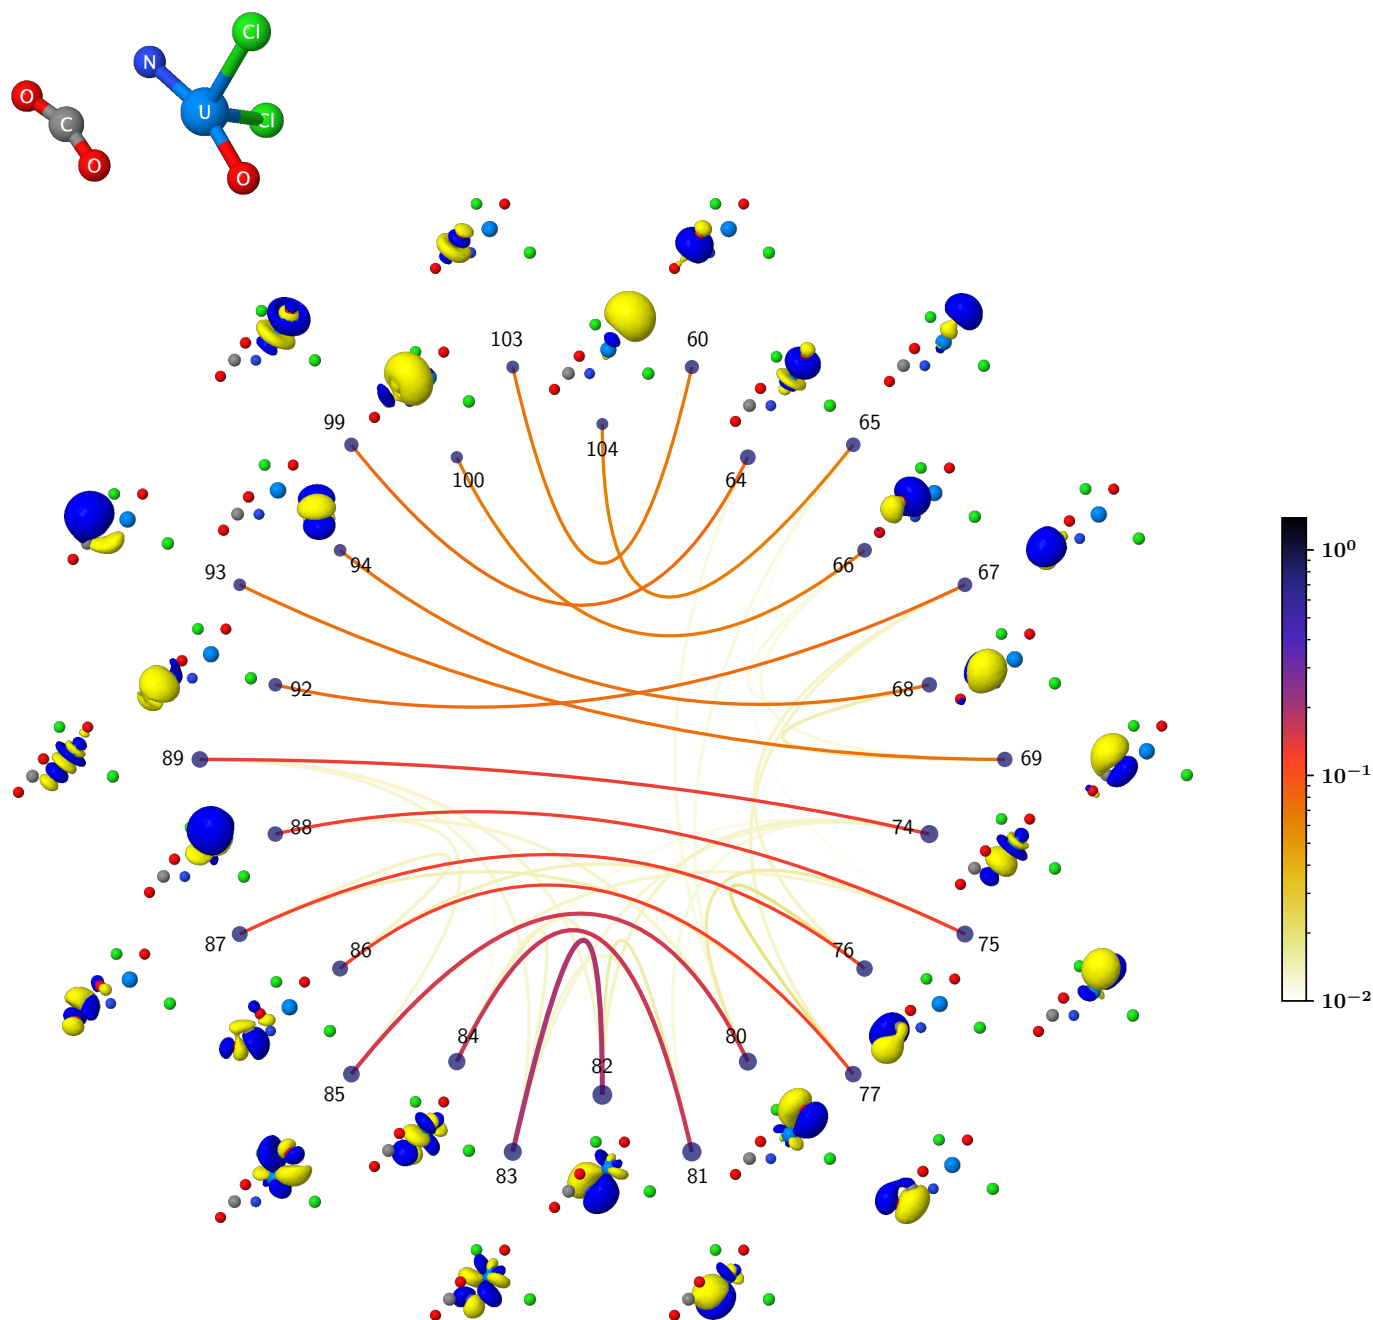

Figure S8: Orbital-pair correlation measures for the third transition state of the reaction coordinate obtained from a fpLCCD wave function. The values of the single-orbital entropies are coded by the size of the dots corresponding to each orbital. The mutual information values correspond to color and width of lines connecting orbitals. All orbital-pair correlations larger than 0.09 have been plotted.



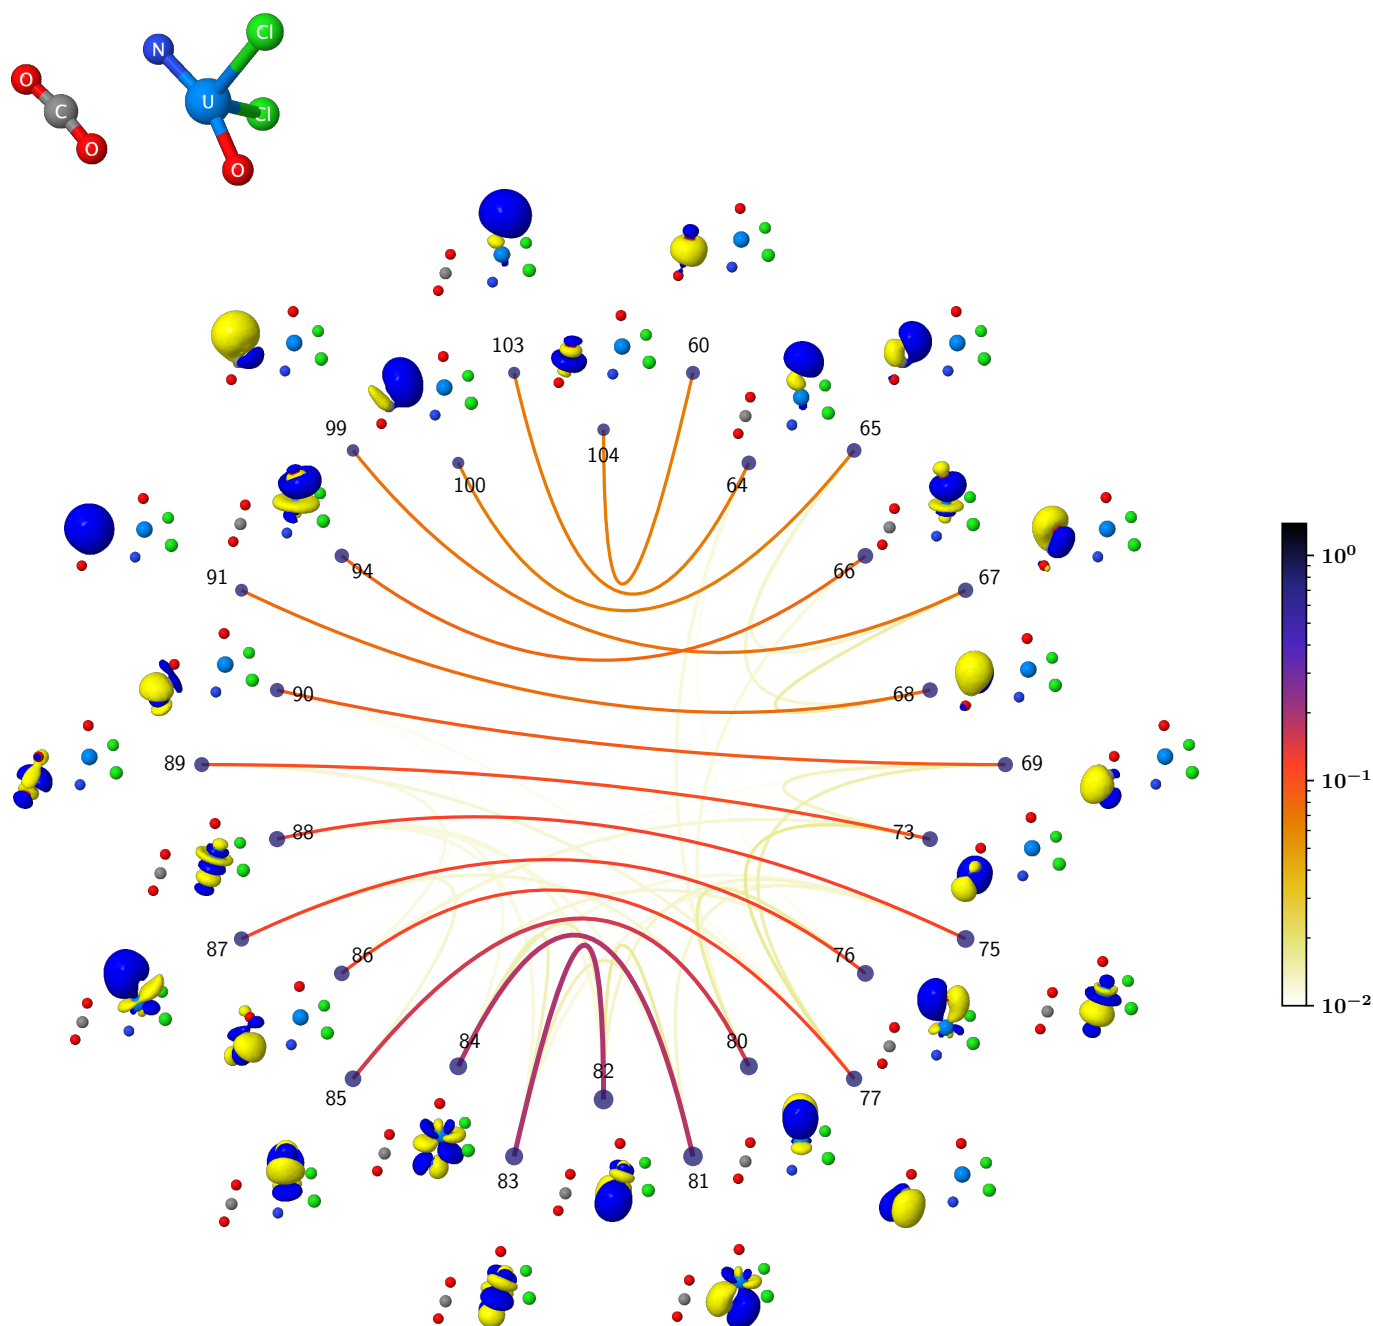

Figure S9: Orbital-pair correlation measures for the second intermediate state of the reaction coordinate obtained from a fpLCCD wave function. The values of the single-orbital entropies are coded by the size of the dots corresponding to each orbital. The mutual information values correspond to color and width of lines connecting orbitals. All orbital-pair correlations larger than 0.09 have been plotted.

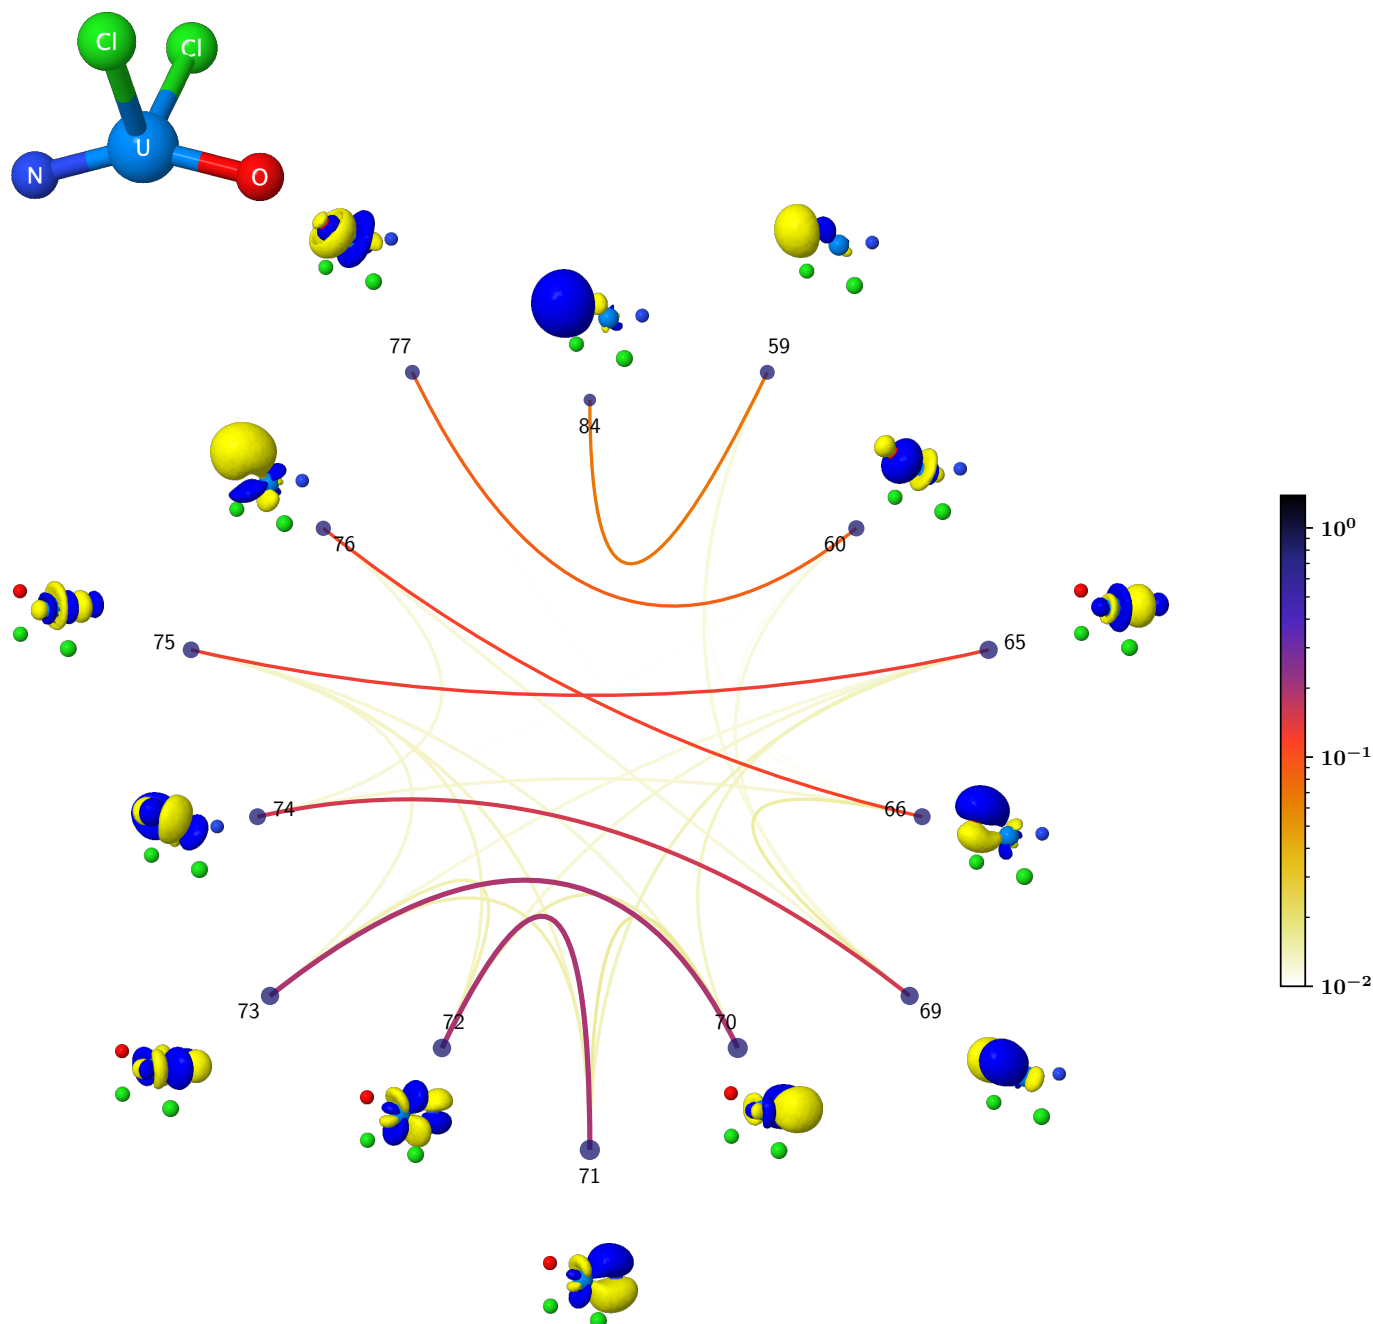

Figure S10: Orbital-pair correlation measures for  $\text{NUOCl}_2$  of the reaction coordinate obtained from a fpLCCD wave function. The values of the single-orbital entropies are coded by the size of the dots corresponding to each orbital. The mutual information values correspond to color and width of lines connecting orbitals. All orbital-pair correlations larger than 0.09 have been plotted.
